# Supplementary material for: Ethylenediamine-mediated synthesis of Mn3O4nano-octahedrons and their performance as electrocatalysts for the oxygen evolution reaction
Source: Royal Society of Chemistry journal article supplement (doi:10.1039/c4nr03822c), 2014-01-01
Supplement: c4nr03822c1.pdf [file c4nr03822c1.pdf]

## Electronic Supplementary Information

### Ethylenediamine-mediated synthesis of $\text{Mn}_3\text{O}_4$ nano-octahedrons and their performance as electrocatalysts for oxygen evolution reaction

*Chun Xian Guo, Shucheng Chen and Xianmao Lu\**

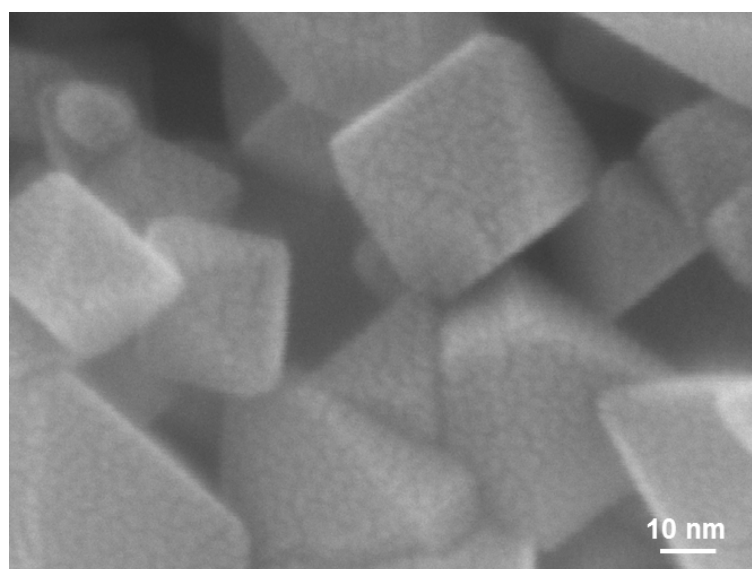

**Figure S1.** High-magnification FESEM image of  $\text{Mn}_3\text{O}_4$  nano-octahedrons.

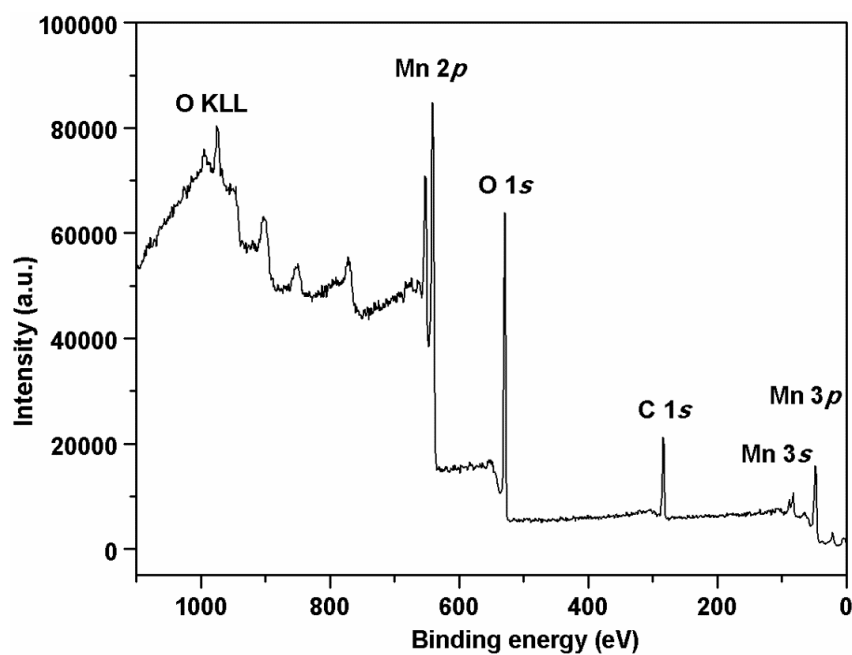

**Figure S2.** XPS survey spectrum of  $\text{Mn}_3\text{O}_4$  nano-octahedrons.

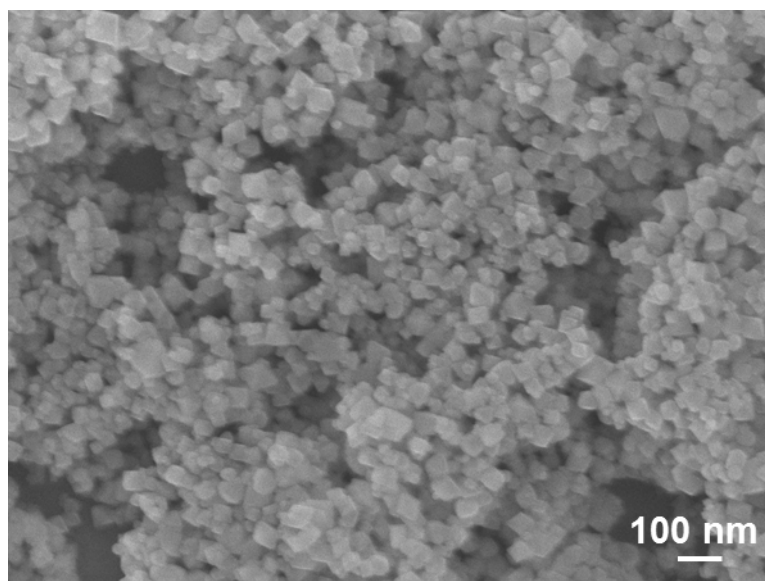

**Figure S3.** FESEM image of  $\text{Mn}_3\text{O}_4$  nano-octahedrons obtained after 12 h.

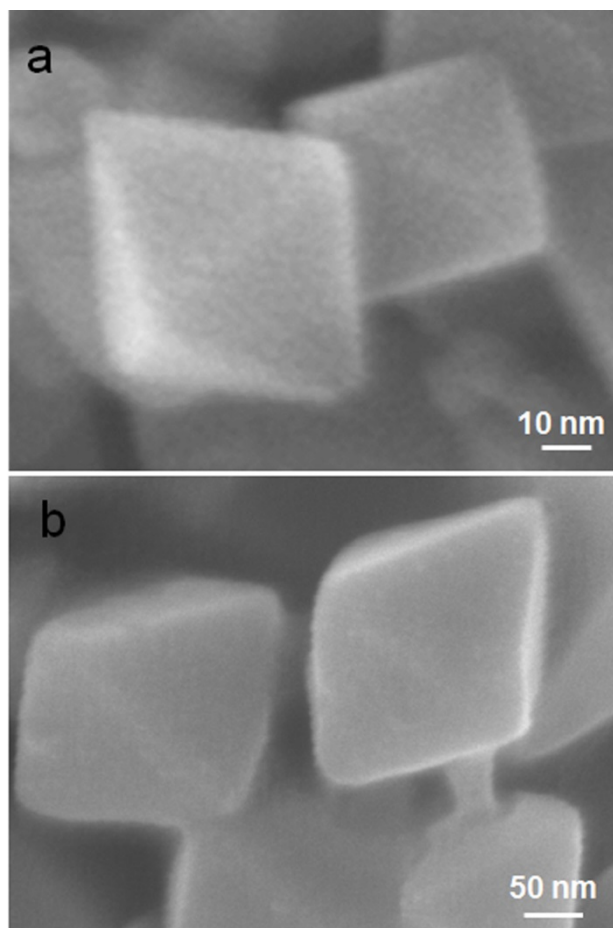

**Figure S4.** FESEM images of (a) 50-nm  $\text{Mn}_3\text{O}_4$  nano-octahedrons and (b) 160-nm  $\text{Mn}_3\text{O}_4$  octahedrons.
